# Supplementary material
Source: PubMed Central journal article supplement (PMC6717281)
Supplement: pnas.1904637116.sapp.pdf [file pnas.1904637116.sapp.pdf]

## Supplementary Information for

### ***Toxoplasma gondii* effector TgIST blocks type I Interferon signaling to promote infection**

Sumit K. Matta<sup>1</sup>, Philipp Olias<sup>1,#</sup>, Zhou Huang<sup>1</sup>, Qiuling Wang<sup>1</sup>, Eugene Park<sup>2</sup>, Wayne M. Yokoyama<sup>2</sup>, L. David Sibley<sup>1\*</sup>

<sup>1</sup> Department of Molecular Microbiology, Washington University School of Medicine, St. Louis. MO 63130

<sup>2</sup> Department of Internal Medicine, Washington University School of Medicine, St. Louis. MO 63130

# Present Address

Institute for Animal Pathology, University of Bern, 3012 Bern, Switzerland

\*Corresponding Author: L. David Sibley

Email: [sibley@wustl.edu](mailto:sibley@wustl.edu)

**This PDF file includes:**

Figs. S1 to S7

Tables S1 to S2

**Other supplementary materials for this manuscript include the following:**

**Dataset S1**

Expression table of genes expressed at mean RPKM > 1 in at least one of six samples in the RNASeq dataset. (Dataset\_S1.csv file).

**Dataset S2**

Table of differentially expressed genes with  $\text{Log}_2(|\text{Fold Change}|) > 1$  and  $-\text{Log}_{10}(P \text{ Value}) > 1.3$  in all samples compared to untreated and uninfected HFFs. (Dataset\_S2.csv file).

Figure S1

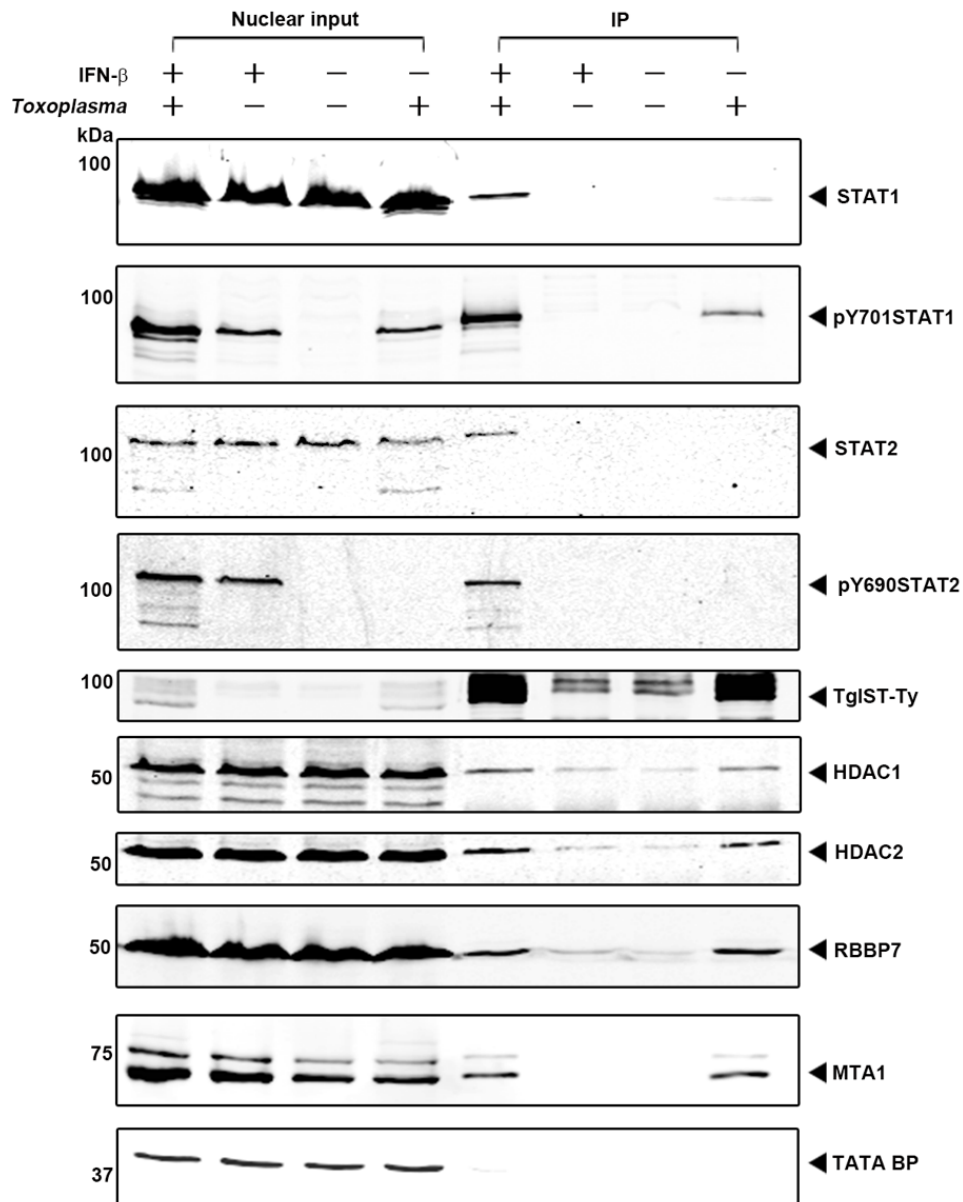

Western blot analysis of IP for TgIST-Ty from nuclear extracts of U3A-STAT1 cells infected with *Toxoplasma gondii* RH strains for 16 h and treated with IFN- $\beta$  for 1h. Uninfected and untreated cells were used as controls. Samples were separated on 10%-12% SDS-PAGE gels and blotted with primary antibodies listed on the right panel.

**Figure S2**

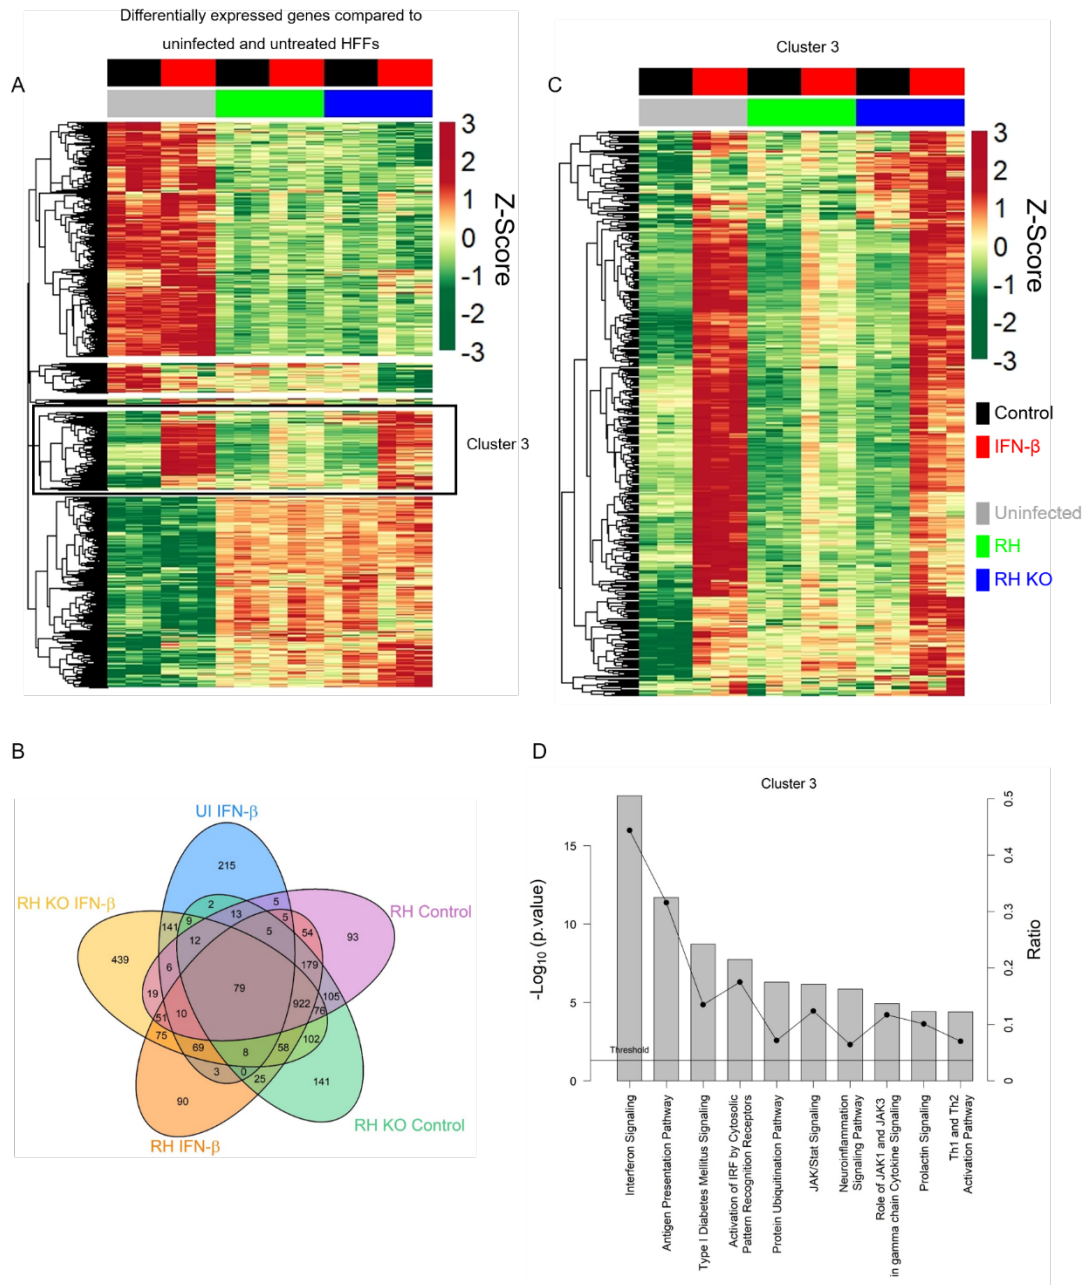

(A) Heatmap of differentially expressed genes in all samples (in triplicates) compared to uninfected control HFFs. The genes were hierarchically clustered using Euclidean distance and complete linkage on normalized  $\text{Log}_2(\text{Fold Change})$ . The genes were divided into 5 clusters 1-5 comprising of 1306, 1063, 437, 36 and 169 genes respectively. (B) Venn diagram of differentially expressed genes in different samples compared to uninfected control HFFs. (C) Expanded

cluster 3 showing normalized expression of genes induced by IFN- $\beta$  in uninfected control and TgIST knockout infected HFFs, whereas, wild type RH infection repressed their expression (D) Canonical pathway analysis using IPA show interferon signaling as the top significantly enriched canonical pathway for genes in cluster 3. The plotted data show level of significance ( $-\text{Log}_{10}(\text{p.value})$ , bars) calculated using Fisher's exact test and ratio (fraction of differentially expressed genes in a pathway, black points with connected line) of the top 10 enriched pathways.

**Figure S3**

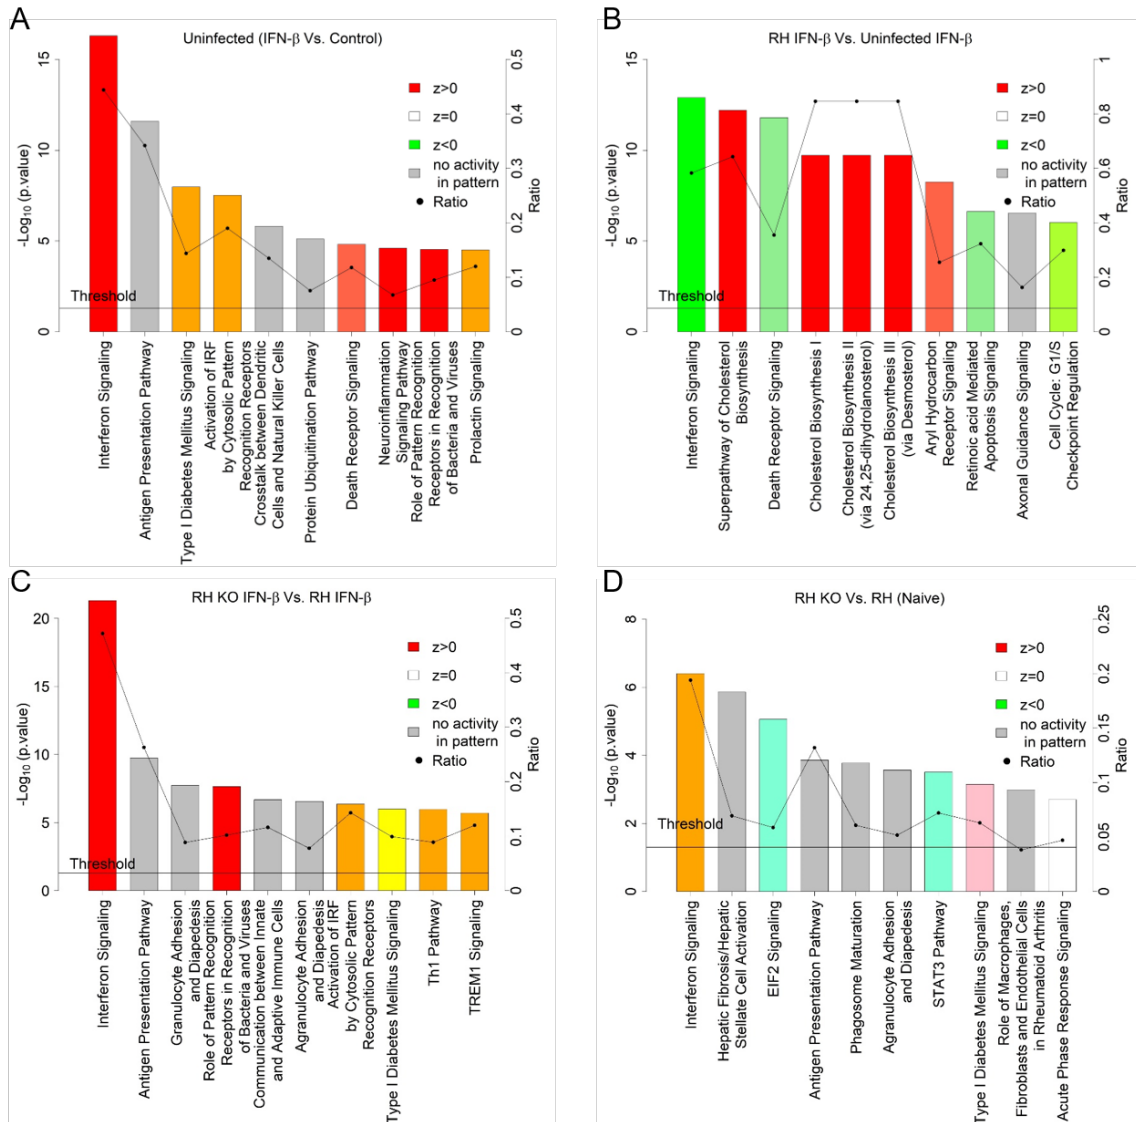

(A-C) Canonical pathway analysis of differentially expressed genes in Fig. 3A-3C using IPA. Bar color represents the z-score (red for positive to green for negative) or the statistical measure of the match between expected and observed gene expression relationship direction for that pathway. Grey bars represent ineligibility of IPA to predict any relationship direction. (D) Canonical pathway analysis of differentially expressed transcripts in naïve HFFs infected with Tg1ST knockout RH compared to wild type RH.

Figure S4

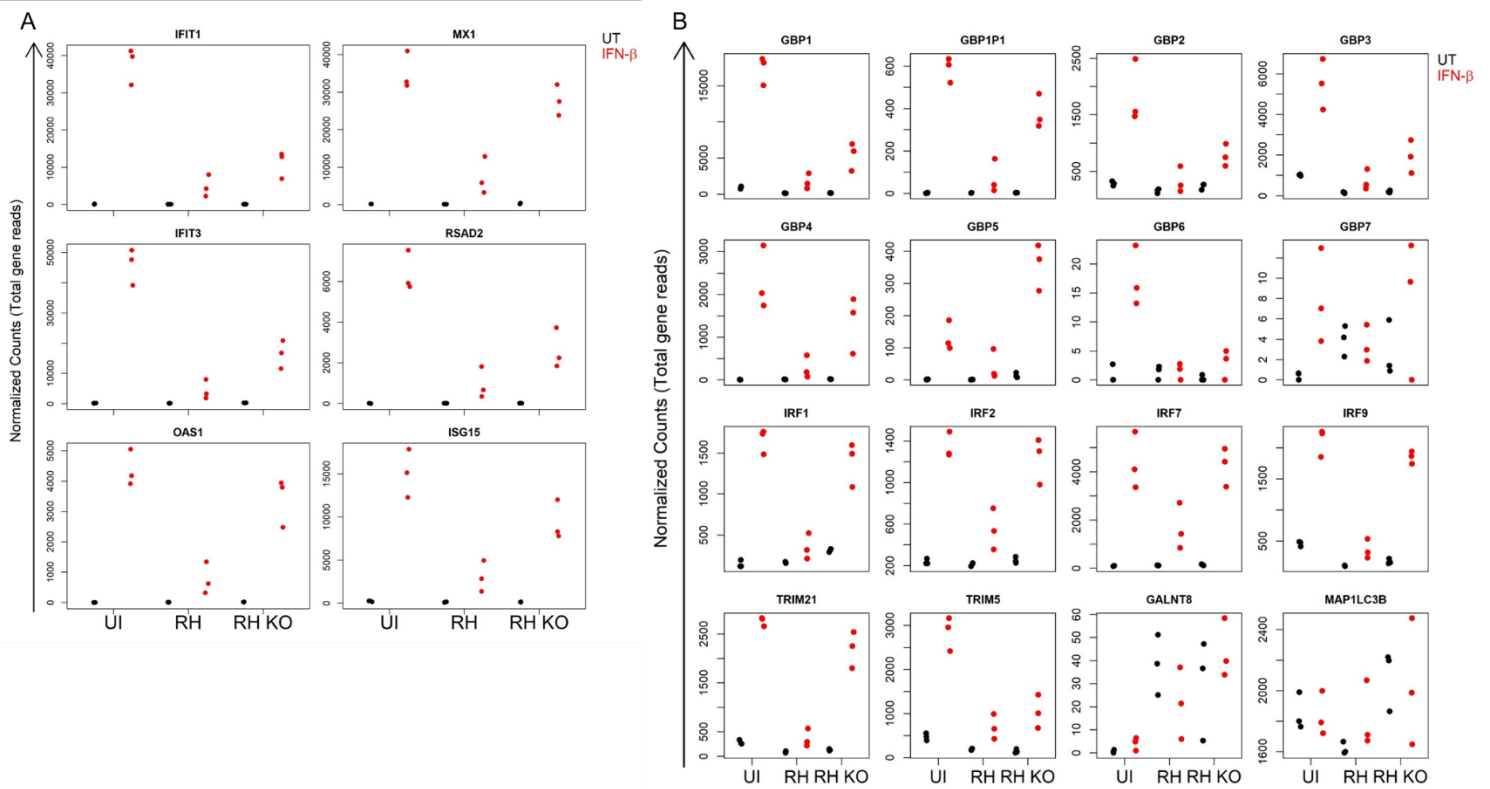

Normalized gene expression (Total gene reads) of (A) representative genes for cellular type I IFN activation and (B) genes involved in cellular defense against pathogens in the RNASeq dataset. Most of the genes that show upregulation by IFN- $\beta$  stimulation of uninfected HFFs also showed increased expression in HFFs infected with TgIST knockout RH compared to wild type RH parasites.

**Figure S5**

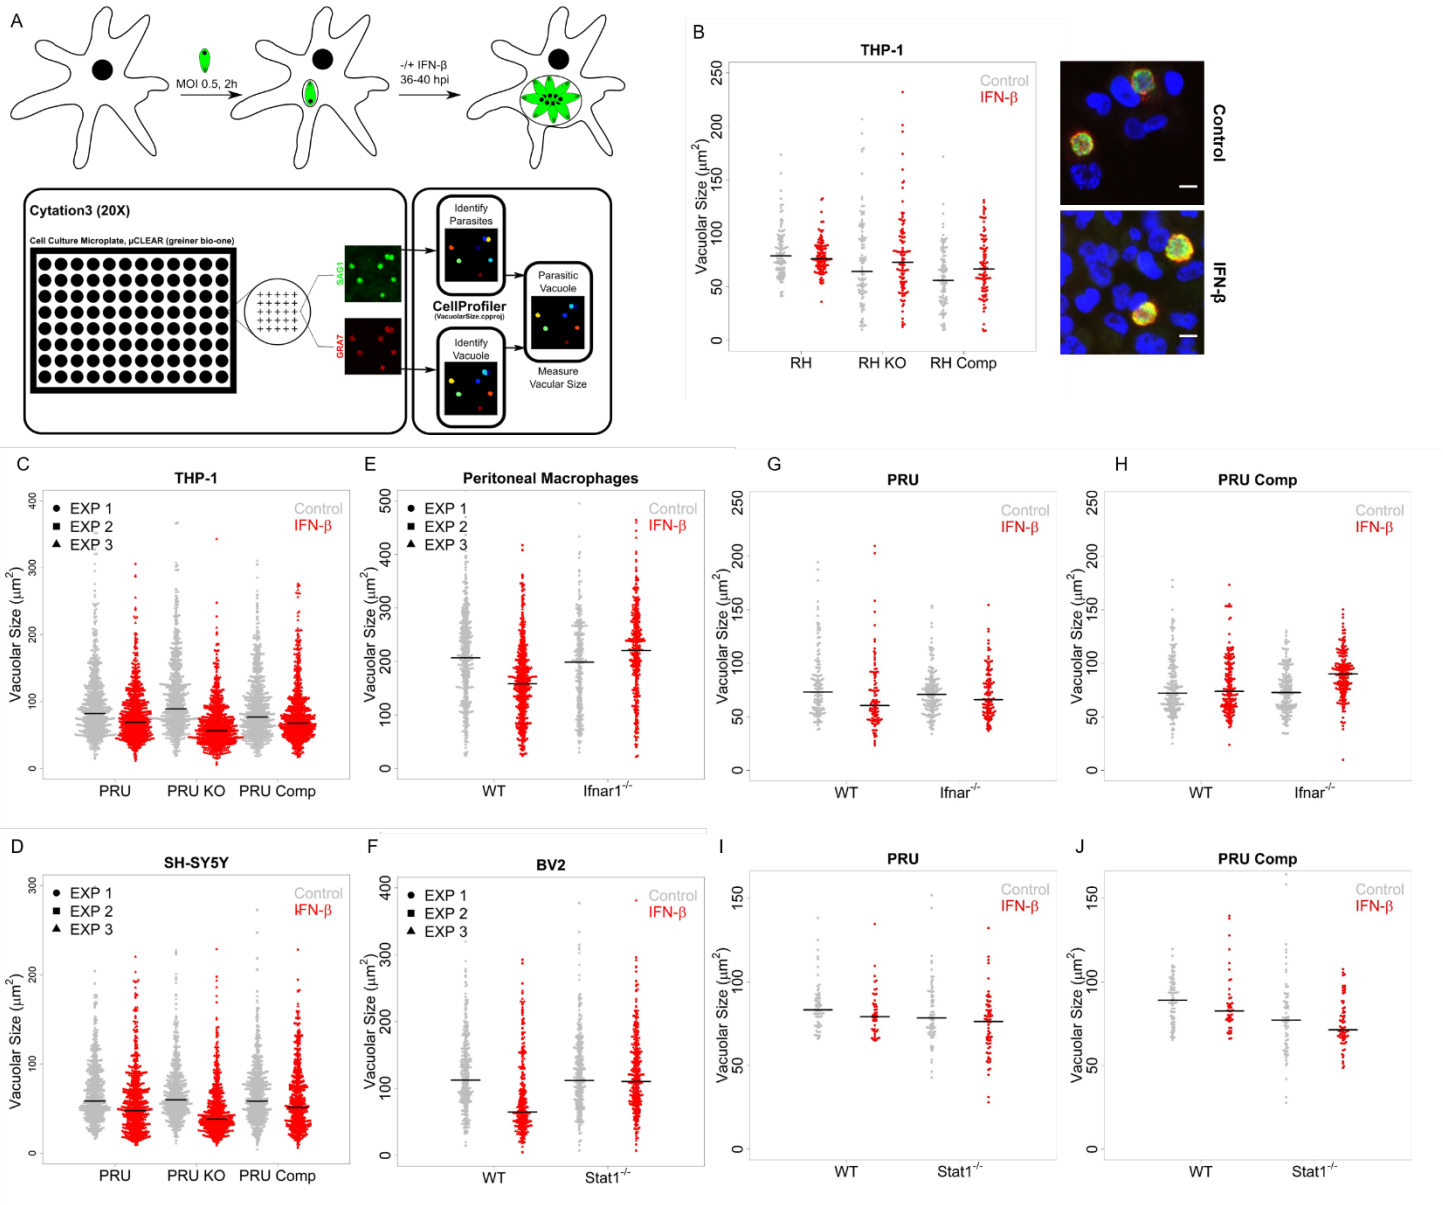

(A) Pipeline used for automated plate-based image acquisition in Cytation3 Multi-Mode plate-based imager. Raw TIF files in different emission channels were acquired and imported into CellProfiler 2.1.1 (Downloaded from <http://cellprofiler.org/releases/>). Images were analyzed using custom designed CellProfiler project template. (B) Vacuolar growth of RHWT, RH KO and RH Comp parasites in PMA differentiated THP-1 cells after 36 h of infection. Scatter plot for vacuolar growth of type II wild type parasites (PRU),  $\Delta$ Tgist knockout (PRU KO) or complemented lines (PRU Comp) after 40 h of infection in (C)



Differentiated THP-1 human macrophages and (D) SH-SY5Y human neuroblastoma cells.  $\Delta$ Tgist knockout (PRU KO) infected (E) wild type (WT) and *lfnar1*<sup>-/-</sup> peritoneal macrophages and (F) mouse microglial wild type (WT) and *Stat1*<sup>-/-</sup> BV2 cells. Vacuolar growth of PRU WT and PRU Comp after 40 h of infection in peritoneal macrophages from wild type and *lfnar1*<sup>-/-</sup> mice (G,H) or wild type and *Stat1*<sup>-/-</sup> BV2 cells (I, J). Each dot represents the mean vacuolar size of parasitophorous vacuole ( $\mu\text{m}^2$ ) of an image with black line representing the median within an experiment. The cells were either treated with TNF- $\alpha$  alone (Control, 10 ng/ml) or in combination with IFN- $\beta$  (100 Units/ml).

**Figure S6**

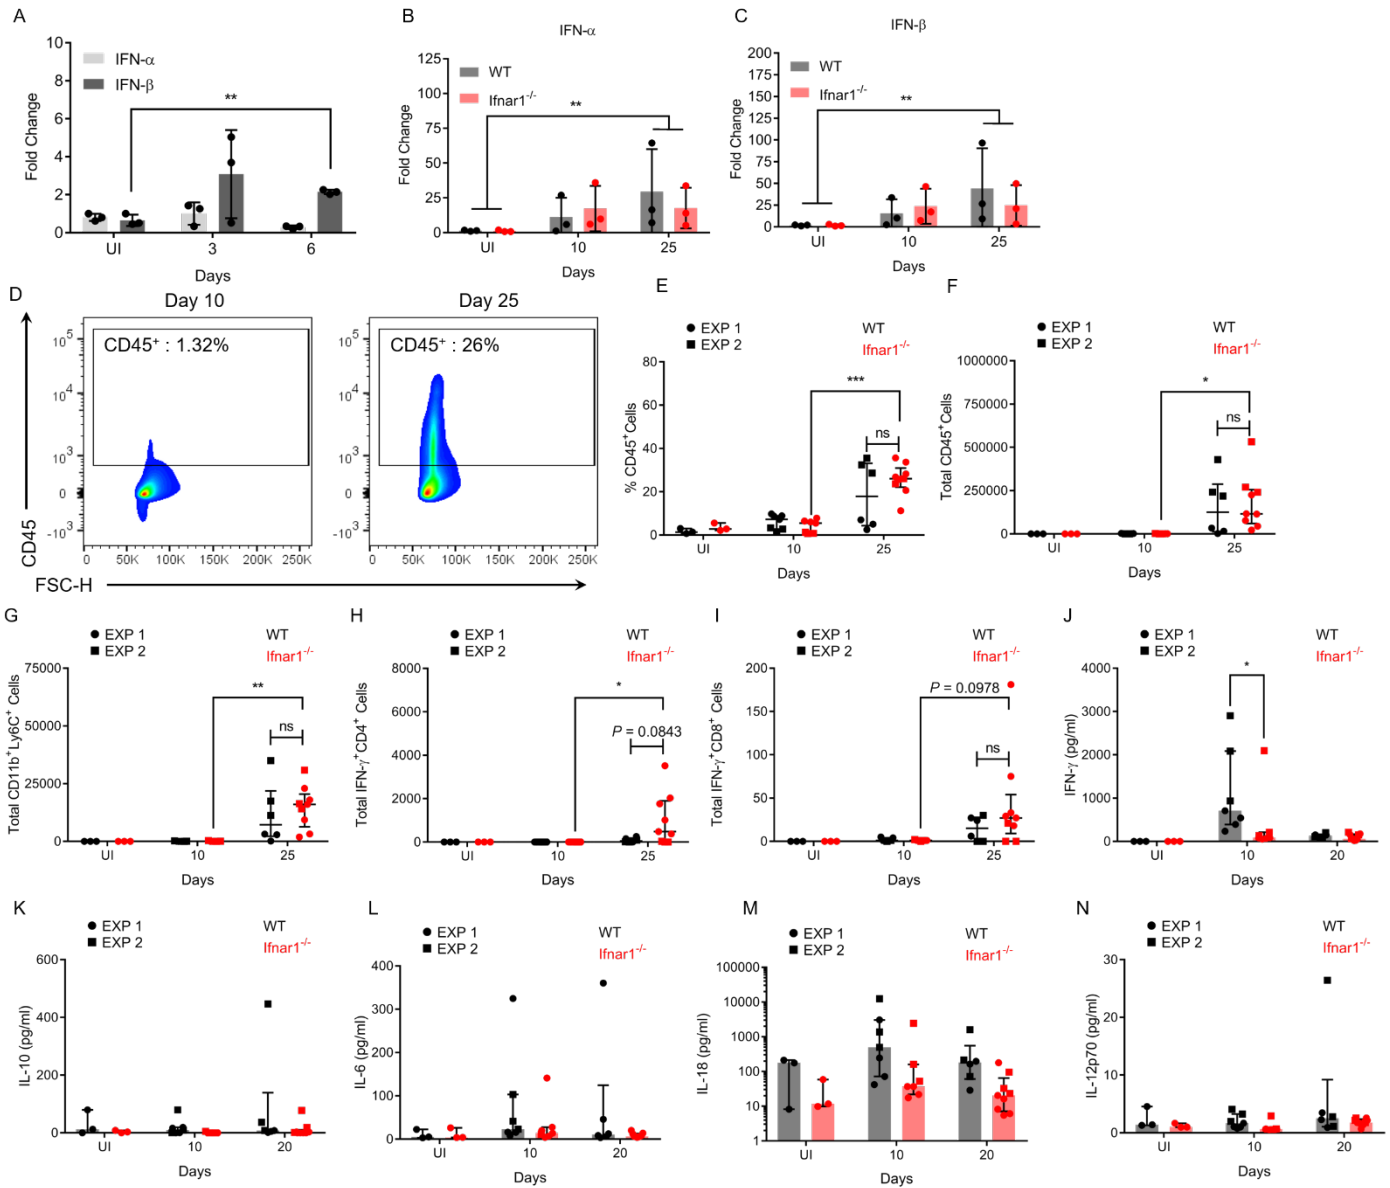

(A) Real time PCR showing mRNA expression of IFN- $\alpha$  and IFN- $\beta$  in peritoneal cells of uninfected mice (UI) or mice infected with 200 tachyzoites of ME49 at 3 days and 6 days post-infection. mRNA expression is plotted as mean fold difference  $\pm$  S.D. compared to uninfected controls. Each dot represents single mouse from each group. \*\* represent significant difference at  $P < 0.01$  between compared samples using unpaired two-tailed Student's  $t$ -test. (B-C) Real time PCR showing mRNA expression of (B) IFN- $\alpha$  and (C) IFN- $\beta$  in brain tissues of uninfected mice or ME49 (5 cyst) infected wild type and *Ifnar1*<sup>-/-</sup> mice at 10 days and 25 days post-infection. mRNA expression is plotted as mean fold difference  $\pm$  S.D. compared to uninfected wild type control mice. \*\* represents significant

difference at  $P < 0.01$  between uninfected and ME49 infected mice (wild type and *Ifnar1*<sup>-/-</sup> combined) at 25 days post-infection using non-parametric Kruskal-Wallis test. (D) Representative plot showing live CD45<sup>+</sup> mononuclear cells in the brain of *Ifnar1*<sup>-/-</sup> mice at 10 days and 25 days post-infection with ME49 cyst. (E) Percentages and (F) total numbers of CD45<sup>+</sup> cells in brain of uninfected and ME49 infected wild type and *Ifnar1*<sup>-/-</sup> mice. Total numbers of (G) CD11b<sup>+</sup>Ly6C<sup>+</sup> cells, (H) IFN- $\gamma$ <sup>+</sup> CD4<sup>+</sup> T-cells and (I) IFN- $\gamma$ <sup>+</sup> CD8<sup>+</sup> T-cells in brain of uninfected or ME49 infected wild type and *Ifnar1*<sup>-/-</sup> mice at 10 days and 25 days post-infection. (J-N) Serum levels of IFN- $\gamma$ , IL-10, IL-6, IL-18 and IL-12p70 in uninfected controls and ME49 infected wild type and *Ifnar1*<sup>-/-</sup> mice. (E-N) shows cumulative data from 2 independent biological replicates plotted as median  $\pm$  I.Q.R. with \* and \*\*\* representing significant difference at  $P < 0.05$  and  $P < 0.01$  between compared groups using Ordinary One-Way ANOVA.

**Figure S7**

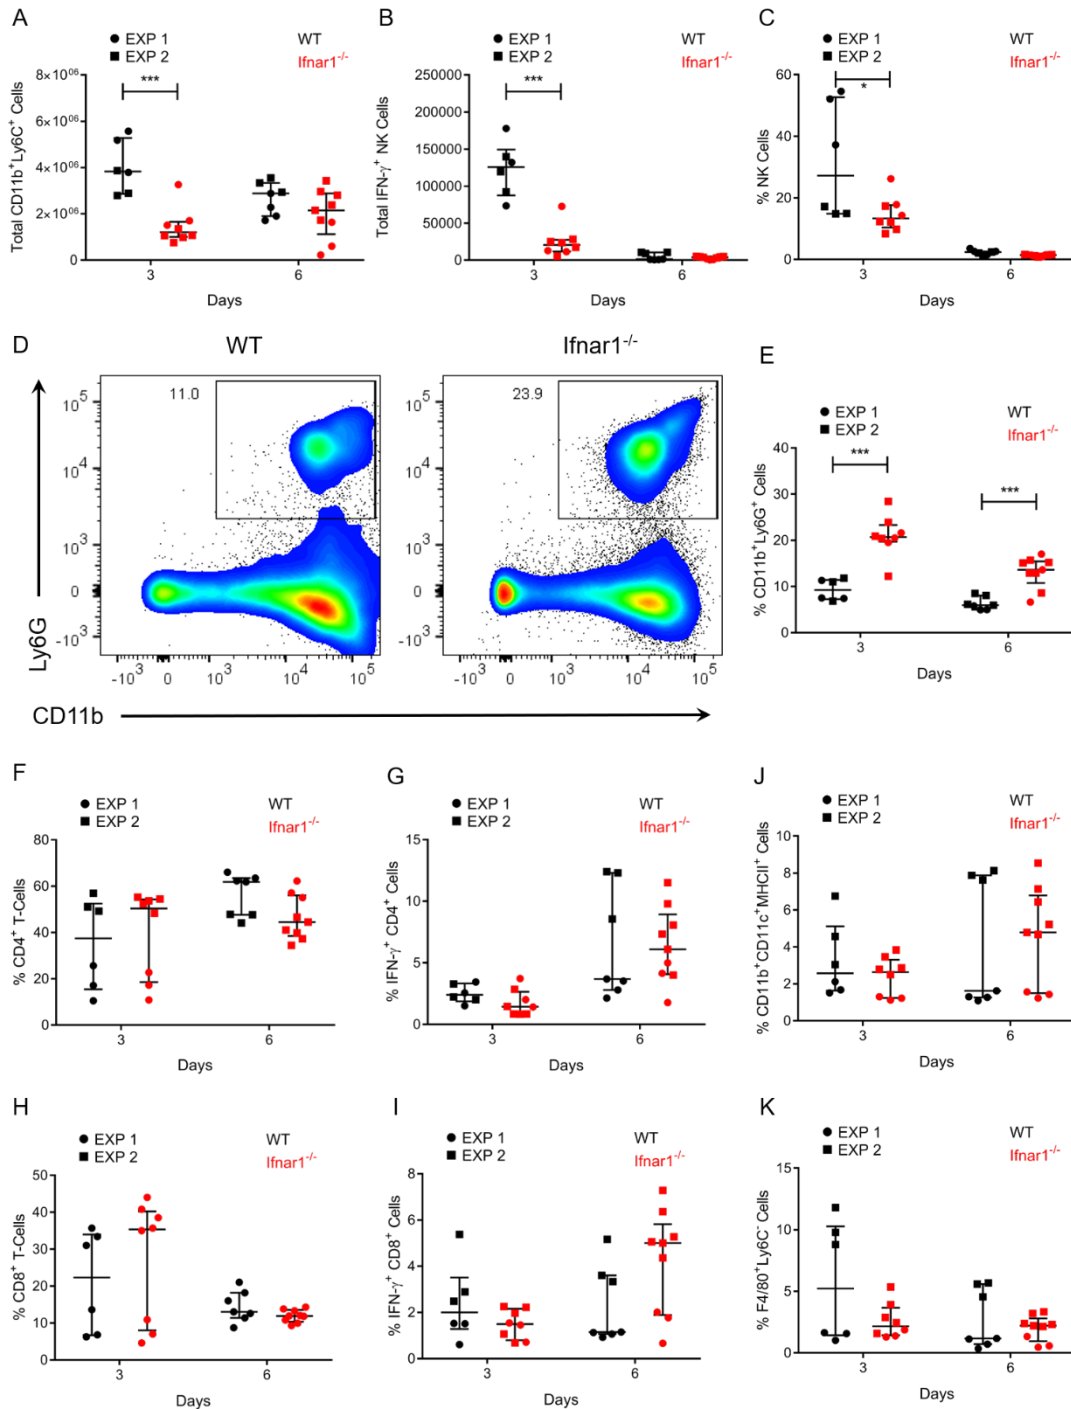

Flow cytometric measurements of different cells in wild type and *Ifnar1*<sup>-/-</sup> mice at day 3 and 6 post infection with 10<sup>5</sup> PRU KO parasites. Total number of (A) CD11b<sup>+</sup>Ly6C<sup>+</sup> monocytes and (B) IFN- $\gamma$ <sup>+</sup> NK cells in the peritoneal exudate. (C) Percentage of total NK cells (NK1.1<sup>+</sup>NKp46<sup>+</sup>). (D) Representative flow plot at day

3 post infection and (E) percentage of neutrophils (CD11b<sup>+</sup>Ly6G<sup>+</sup>). Percentage of (F) total CD4<sup>+</sup> T-Cells, (G) IFN- $\gamma$ <sup>+</sup> CD4<sup>+</sup> T-Cells, (H) total CD8<sup>+</sup> T-cells, (I) IFN- $\gamma$ <sup>+</sup> CD8<sup>+</sup> T-Cells, (J) dendritic cells (CD11b<sup>+</sup>CD11c<sup>+</sup>MHCII<sup>+</sup>) and (K) resident macrophages (F4/80<sup>+</sup>Ly6C<sup>-</sup>). Cumulative data from 2 independent experiments is shown in C-I. Quantitative data is plotted as median  $\pm$  I.Q.R. \* and \*\*\* represents significant difference at  $P < 0.05$  and  $P < 0.005$  respectively between compared groups using multiple Student's *t*-test with Holm-Sidak correction.

**Table S1**

List of genes associated with activated STAT1 signaling and differentially expressed in IFN- $\beta$  stimulated HFFs infected with TgIST knockout RH compared to wild type.

| ID              | Genes in dataset | Prediction<br>(based on<br>measurement<br>direction) | Expr Log Ratio | Findings         |
|-----------------|------------------|------------------------------------------------------|----------------|------------------|
| ENSG00000132530 | XAF1             | Activated                                            | 1.533          | Upregulates (1)  |
| ENSG00000140105 | WARS             | Activated                                            | 2.265          | Upregulates (2)  |
| ENSG00000184979 | USP18            | Activated                                            | 1.913          | Upregulates (1)  |
| ENSG00000213886 | UBD              | Activated                                            | 3.128          | Upregulates (1)  |
| ENSG00000132109 | TRIM21           | Activated                                            | 2.576          | Upregulates (1)  |
| ENSG00000135148 | TRAFD1           | Activated                                            | 1.478          | Upregulates (1)  |
| ENSG00000168394 | TAP1             | Activated                                            | 2.338          | Upregulates (14) |
| ENSG00000170581 | STAT2            | Activated                                            | 1.596          | Upregulates (2)  |
| ENSG00000115415 | STAT1            | Activated                                            | 1.121          | Upregulates (74) |
| ENSG00000135899 | SP110            | Activated                                            | 1.496          | Upregulates (1)  |
| ENSG00000184557 | SOCS3            | Activated                                            | 3.537          | Upregulates (13) |
| ENSG00000185338 | SOCS1            | Activated                                            | 1.252          | Upregulates (14) |
| ENSG00000101347 | SAMHD1           | Activated                                            | 1.627          | Upregulates (1)  |
| ENSG00000177409 | SAMD9L           | Activated                                            | 1.414          | Upregulates (1)  |
| ENSG00000134321 | RSAD2            | Activated                                            | 1.416          | Upregulates (1)  |
| ENSG00000173821 | RNF213           | Activated                                            | 1.615          | Upregulates (1)  |
| ENSG00000240065 | PSMB9            | Activated                                            | 2.358          | Upregulates (17) |
| ENSG00000204264 | PSMB8            | Activated                                            | 2.057          | Upregulates (2)  |
| ENSG00000205220 | PSMB10           | Activated                                            | 1.457          | Upregulates (1)  |
| ENSG00000141682 | PMAIP1           | Activated                                            | 1.787          | Upregulates (1)  |
| ENSG00000135114 | OASL             | Activated                                            | 1.743          | Upregulates (1)  |
| ENSG00000089127 | OAS1             | Activated                                            | 2.134          | Upregulates (3)  |
| ENSG00000140853 | NLRC5            | Activated                                            | 2.336          | Upregulates (1)  |
| ENSG00000185499 | MUC1             | Activated                                            | 1.79           | Upregulates (1)  |
| ENSG00000187608 | ISG15            | Activated                                            | 1.557          | Upregulates (5)  |
| ENSG00000213928 | IRF9             | Activated                                            | 2.317          | Upregulates (11) |
| ENSG00000185507 | IRF7             | Activated                                            | 1.293          | Upregulates (8)  |
| ENSG00000168310 | IRF2             | Activated                                            | 1.227          | Upregulates (1)  |
| ENSG00000125347 | IRF1             | Activated                                            | 1.933          | Upregulates (57) |
| ENSG00000115594 | IL1R1            | Activated                                            | 1.224          | Upregulates (2)  |
| ENSG00000134470 | IL15RA           | Activated                                            | 1.355          | Upregulates (1)  |
| ENSG00000142089 | IFITM3           | Activated                                            | 1.216          | Upregulates (1)  |
| ENSG00000185201 | IFITM2           | Activated                                            | 1.087          | Upregulates (2)  |
| ENSG00000185885 | IFITM1           | Activated                                            | 2.209          | Upregulates (6)  |
| ENSG00000119917 | IFIT3            | Activated                                            | 1.852          | Upregulates (5)  |
| ENSG00000185745 | IFIT1            | Activated                                            | 1.122          | Upregulates (4)  |
| ENSG00000115267 | IFIH1            | Activated                                            | 2.012          | Upregulates (1)  |
| ENSG00000126709 | IFI6             | Activated                                            | 2.04           | Upregulates (4)  |
| ENSG00000068079 | IFI35            | Activated                                            | 2.279          | Upregulates (2)  |
| ENSG00000216490 | IFI30            | Activated                                            | 2.015          | Upregulates (1)  |
| ENSG00000090339 | ICAM1            | Activated                                            | 1.615          | Upregulates (19) |

|                 |          |           |        |                   |
|-----------------|----------|-----------|--------|-------------------|
| ENSG00000204592 | HLA-E    | Activated | 1.445  | Upregulates (1)   |
| ENSG00000138642 | HERC6    | Activated | 1.799  | Upregulates (1)   |
| ENSG00000140511 | HAPLN3   | Activated | 2.384  | Upregulates (1)   |
| ENSG00000162654 | GBP4     | Activated | 2.2    | Upregulates (1)   |
| ENSG00000117226 | GBP3     | Activated | 1.346  | Upregulates (3)   |
| ENSG00000162645 | GBP2     | Activated | 1.206  | Upregulates (11)  |
| ENSG00000225492 | GBP1P1   | Activated | 2.39   | Upregulates (1)   |
| ENSG00000117228 | GBP1     | Activated | 1.581  | Upregulates (3)   |
| ENSG00000138685 | FGF2     | Activated | -1.003 | Downregulates (3) |
| ENSG00000137628 | DDX60    | Activated | 1.595  | Upregulates (1)   |
| ENSG00000169245 | CXCL10   | Activated | 3.275  | Upregulates (35)  |
| ENSG00000163131 | CTSS     | Activated | 1.794  | Upregulates (1)   |
| ENSG00000134326 | CMPK2    | Activated | 2.579  | Upregulates (1)   |
| ENSG00000101017 | CD40     | Activated | 1.193  | Upregulates (28)  |
| ENSG00000120217 | CD274    | Activated | 1.417  | Upregulates (8)   |
| ENSG00000137752 | CASP1    | Activated | 1.191  | Upregulates (6)   |
| ENSG00000125730 | C3       | Activated | 1.274  | Upregulates (2)   |
| ENSG00000113916 | BCL6     | Activated | 1.646  | Upregulates (1)   |
| ENSG00000168062 | BATF2    | Activated | 3.099  | Upregulates (2)   |
| ENSG00000221963 | APOL6    | Activated | 2.623  | Upregulates (1)   |
| ENSG00000239713 | APOBEC3G | Activated | 1.239  | Upregulates (1)   |
| ENSG00000175899 | A2M      | Activated | 1.225  | Upregulates (2)   |
| ENSG00000169429 | CXCL8    | Inhibited | -2.353 | Upregulates (4)   |
| ENSG00000164400 | CSF2     | Inhibited | -1.537 | Upregulates (1)   |
| ENSG00000115009 | CCL20    | Inhibited | -1.083 | Upregulates (2)   |
| ENSG00000135744 | AGT      | Affected  | 1.389  | Regulates (3)     |
| ENSG00000089685 | BIRC5    | Affected  | -1.243 | Regulates (1)     |
| ENSG00000137496 | IL18BP   | Affected  | 1.266  | Regulates (1)     |
| ENSG00000157601 | MX1      | Affected  | 1.845  | Regulates (1)     |
| ENSG00000111335 | OAS2     | Affected  | 2.381  | Regulates (1)     |
| ENSG00000138496 | PARP9    | Affected  | 1.579  | Regulates (1)     |
| ENSG00000137193 | PIM1     | Affected  | 2.002  | Regulates (1)     |
| ENSG00000164342 | TLR3     | Affected  | 1.277  | Regulates (1)     |
| ENSG00000102524 | TNFSF13B | Affected  | 1.832  | Regulates (1)     |
| ENSG00000132274 | TRIM22   | Affected  | 1.596  | Regulates (1)     |
| ENSG00000025708 | TYMP     | Affected  | 1.231  | Regulates (1)     |

## Table S2

List of transcripts associated with activated STAT1 signaling and differentially expressed in naïve HFFs infected with TgIST knockout RH compared to wild type.

| ID              | Genes in dataset | Prediction (based on measurement direction) | Expr Log Ratio | Findings          |
|-----------------|------------------|---------------------------------------------|----------------|-------------------|
| ENSG00000140105 | WARS             | Activated                                   | 1.772          | Upregulates (2)   |
| ENSG00000132109 | TRIM21           | Activated                                   | 1.339          | Upregulates (1)   |
| ENSG00000168394 | TAP1             | Activated                                   | 1.341          | Upregulates (14)  |
| ENSG00000184557 | SOCS3            | Activated                                   | 1.8            | Upregulates (13)  |
| ENSG00000159216 | RUNX1            | Activated                                   | 1.279          | Upregulates (1)   |
| ENSG00000240065 | PSMB9            | Activated                                   | 1.213          | Upregulates (17)  |
| ENSG00000204264 | PSMB8            | Activated                                   | 1.002          | Upregulates (2)   |
| ENSG00000185499 | MUC1             | Activated                                   | 1.42           | Upregulates (1)   |
| ENSG00000125347 | IRF1             | Activated                                   | 1.246          | Upregulates (57)  |
| ENSG00000115594 | IL1R1            | Activated                                   | 2.449          | Upregulates (2)   |
| ENSG00000185885 | IFITM1           | Activated                                   | 1.458          | Upregulates (6)   |
| ENSG00000068079 | IFI35            | Activated                                   | 1.058          | Upregulates (2)   |
| ENSG00000090339 | ICAM1            | Activated                                   | 1.282          | Upregulates (19)  |
| ENSG00000140511 | HAPLN3           | Activated                                   | 1.591          | Upregulates (1)   |
| ENSG00000026103 | FAS              | Activated                                   | 1.538          | Upregulates (6)   |
| ENSG00000113916 | BCL6             | Activated                                   | 1.169          | Upregulates (1)   |
| ENSG00000221963 | APOL6            | Activated                                   | 1.922          | Upregulates (1)   |
| ENSG00000100985 | MMP9             | Inhibited                                   | 1.306          | Downregulates (5) |
| ENSG00000138685 | FGF2             | Inhibited                                   | 2.054          | Downregulates (3) |
| ENSG00000169429 | CXCL8            | Inhibited                                   | -2.197         | Upregulates (4)   |
| ENSG00000182326 | C1S              | Inhibited                                   | -1.426         | Upregulates (1)   |
| ENSG00000157601 | MX1              | Affected                                    | 1.787          | Regulates (1)     |



**Table S3**

List of real time PCR primers

| <b>Gene</b>    | <b>Forward (5' → 3')</b>   | <b>Reverse (5' → 3')</b>   |
|----------------|----------------------------|----------------------------|
| IFIT1          | ATGTATTACCACATGGGCAGACTGG  | CATCCTTCCTCACAGTCTATTTCTGG |
| MX1            | TCGGGCAAGAGCTCCGTGTTG      | CAAGTTTCTTCAGTTTCAGCACCAGC |
| IFIT3          | CAAGGAAGACAGTGTCTCAAGGGATC | ACTCTTCAGCTTGCCGTAAGCATTCC |
| RSAD2          | GTGAGGTTCTGCAAAGTAGAGTTGC  | TTCCTCGTCAAAGCTGTACACAGG   |
| OAS1           | TGCTTCCGAGGTAGCTCCTACC     | ACTGAGGAAGACAACCAGGTCAGC   |
| ISG15          | ACTCATCTTTGCCAGTACAGG      | CAGCTCTGACACCGACATG        |
| YWHAZ          | ACTACCGTTACTTGGCTGAGGTTGC  | CCAGTCTGATAGGATGTGTTGGTTGC |
| mIFN- $\alpha$ | CTTCCACAGGATCACTGTGTACCT   | TTCTGCTCTGACCACCTCCC       |
| mIFN- $\beta$  | CGAGCAGAGATCTTCAGGAAC      | TCACTACCAGTCCCAGAGTC       |
| mActin         | ACCTTCTACAATGAGCTGCG       | CTGGATGGCTACGTACATGG       |
